# Supplementary material
Source: HighWire-hosted journal article supplement (https://oem.bmj.com/content/76/2/105)

**Supplementary material 1.** Flowchart of the selection of the population for analyses on the association between organic dust exposure and COPD.

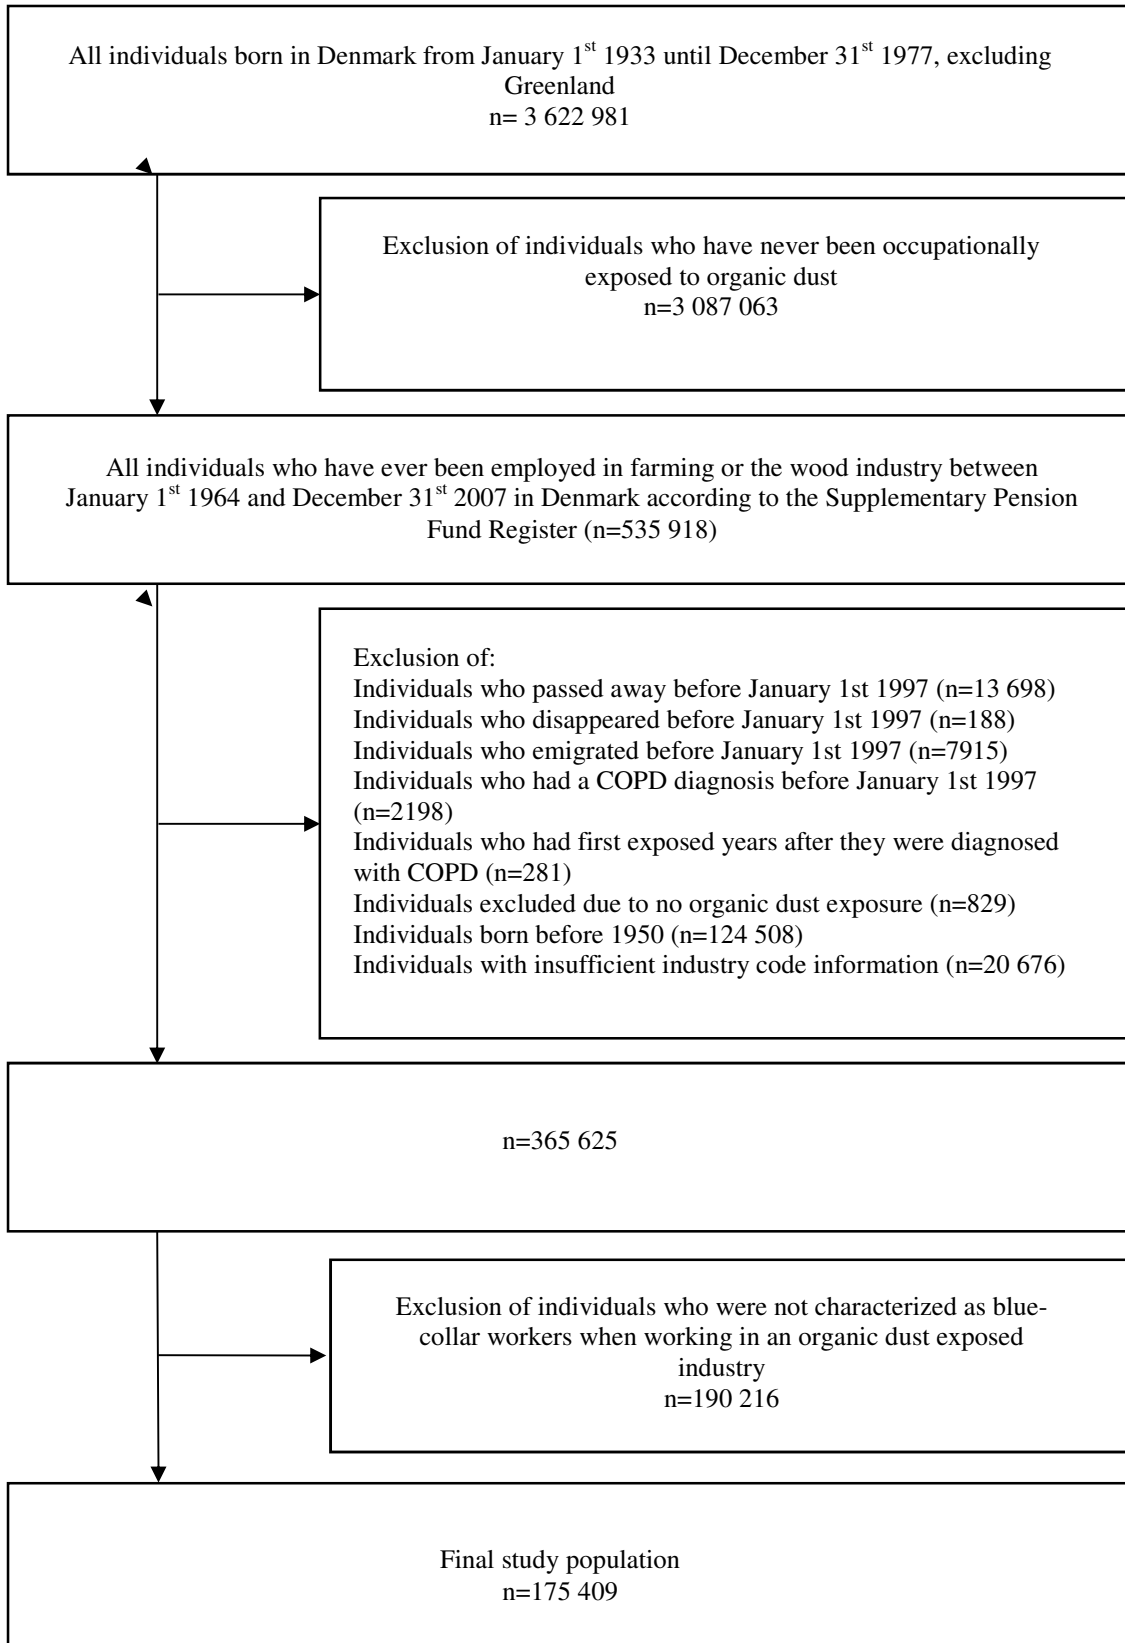

Supplement: inline-supplementary-material-1 [file inline-supplementary-material-1.pdf]
