# Supplementary material
Source: HighWire-hosted journal article supplement (https://oem.bmj.com/content/76/2/105)
Supplement: inline-supplementary-material-2 [file inline-supplementary-material-2.pdf]

## Supplementary material 2

### List of ICD-10 and ICD-8 diagnostic codes included to define COPD

COPD was defined as the presence of at least one of the following diagnostic codes according to the International Classification of Diseases, 10<sup>th</sup> revision (ICD-10, 1994-now) or the International Classification of Diseases, 8<sup>th</sup> revision (1965-1994);

J43: Emphysema

J43.0: Unilateral pulmonary emphysema

J43.1: Panlobular emphysema

J43.2: Centrilobular emphysema

J43.8: Other emphysema

J43.9: Bullous emphysema

J44: Other chronic obstructive pulmonary disease

J44.0: Chronic obstructive pulmonary disease with acute lower respiratory infection

J44.1: Chronic obstructive pulmonary disease with acute exacerbation, unspecified

J44.8: Other specified chronic obstructive pulmonary

J44.9: Chronic obstructive pulmonary disease, unspecified

490: Bronchitis, unspecified

491: Chronic bronchitis

492: Emphysema
