# Supplementary material
Source: HighWire-hosted journal article supplement (https://oem.bmj.com/content/76/2/105)
Supplement: inline-supplementary-material-3 [file inline-supplementary-material-3.pdf]

**Supplementary material 3.** RR (95% CI) of COPD by quartiles of cumulative organic dust exposure stratified by exposure source.

| Exposure category                        | Overall        |                     |                |                                | Organic dust exposure from farming |                     |                |                                | Organic dust exposure from wood industry |                     |                |                                |                |
|------------------------------------------|----------------|---------------------|----------------|--------------------------------|------------------------------------|---------------------|----------------|--------------------------------|------------------------------------------|---------------------|----------------|--------------------------------|----------------|
|                                          | COPD cases (n) | RR <sub>crude</sub> | (95% CI)       | RR <sub>adj</sub> <sup>a</sup> | (95% CI)                           | RR <sub>crude</sub> | (95% CI)       | RR <sub>adj</sub> <sup>a</sup> | (95% CI)                                 | RR <sub>crude</sub> | (95% CI)       | RR <sub>adj</sub> <sup>a</sup> | (95% CI)       |
| Low                                      | 966            | 1.00                |                | 1.00                           |                                    | 1.00                |                | 1.00                           |                                          | 1.00                |                | 1.00                           |                |
| Intermediate-low                         | 853            | 0.88                | (0.81 to 0.97) | 0.90                           | (0.82 to 0.99)                     | 0.77                | (0.65 to 0.90) | 0.92                           | (0.78 to 1.09)                           | 0.90                | (0.80 to 1.02) | 0.84                           | (0.75 to 0.95) |
| Intermediate-high                        | 738            | 0.76                | (0.69 to 0.84) | 0.76                           | (0.69 to 0.84)                     | 0.56                | (0.47 to 0.67) | 0.71                           | (0.60 to 0.85)                           | 0.86                | (0.76 to 0.98) | 0.75                           | (0.65 to 0.85) |
| High                                     | 605            | 0.63                | (0.57 to 0.69) | 0.52                           | (0.47 to 0.58)                     | 0.48                | (0.39 to 0.59) | 0.59                           | (0.48 to 0.72)                           | 0.65                | (0.57 to 0.74) | 0.46                           | (0.40 to 0.53) |
| Per mg/m <sup>3</sup> -year <sup>b</sup> |                | 0.99                | (0.99 to 0.99) | 0.98                           | (0.98 to 0.98)                     | 0.97                | (0.97 to 0.98) | 0.98                           | (0.97 to 0.99)                           | 0.99                | (0.99 to 0.99) | 0.98                           | (0.98 to 0.99) |

<sup>a</sup>Adjustment for age group, calendar year, and sex

<sup>b</sup>Continuous cumulative organic dust exposure
